# Supplementary material for: Sulphate Uptake Plays a Major Role in the Production of Sulphur Dioxide by Yeast Cells during Oenological Fermentations
Source: MDPI journal article supplement (doi:10.3390/fermentation9030280), 2023-03-13
Supplement: s1 [file s1]

## Supplementary Materials.

**Figure S1:** plasmid maps

**Figure S2:** PCR analysis of *SUL1* and *SUL2* loci

**Figure S3:** genotype analysis by PCR inter-delta assay

**Table S1:** volatile compounds detected by GC-MS analysis

**Table S2:** plasmids and primers

**Table S3:** features of natural grape juices

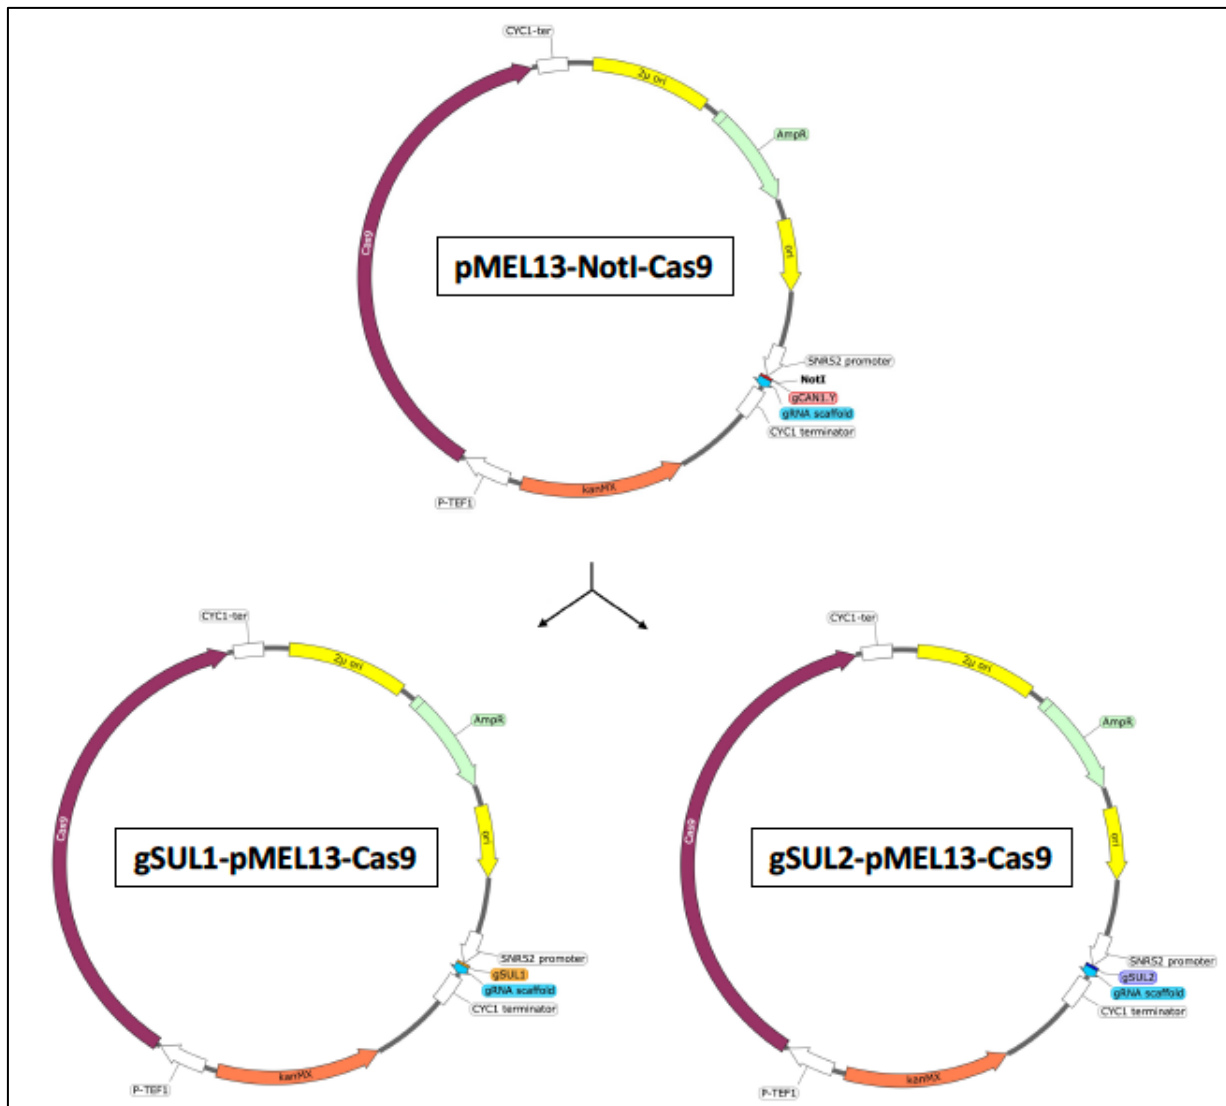

**Supplementary Figure S1. Plasmids used.**

Maps of the plasmids constructed in this work, representing their main features. By the site-specific replacement of the gCAN.Y sequence (including the NotI site) with a specific target gDNA region (as indicated for *SUL1* or *SUL2* genes), the gDNA-pME13-Cas9 plasmid can be used to manipulate the genome of any natural yeast strain without the need for specific auxotrophic markers.

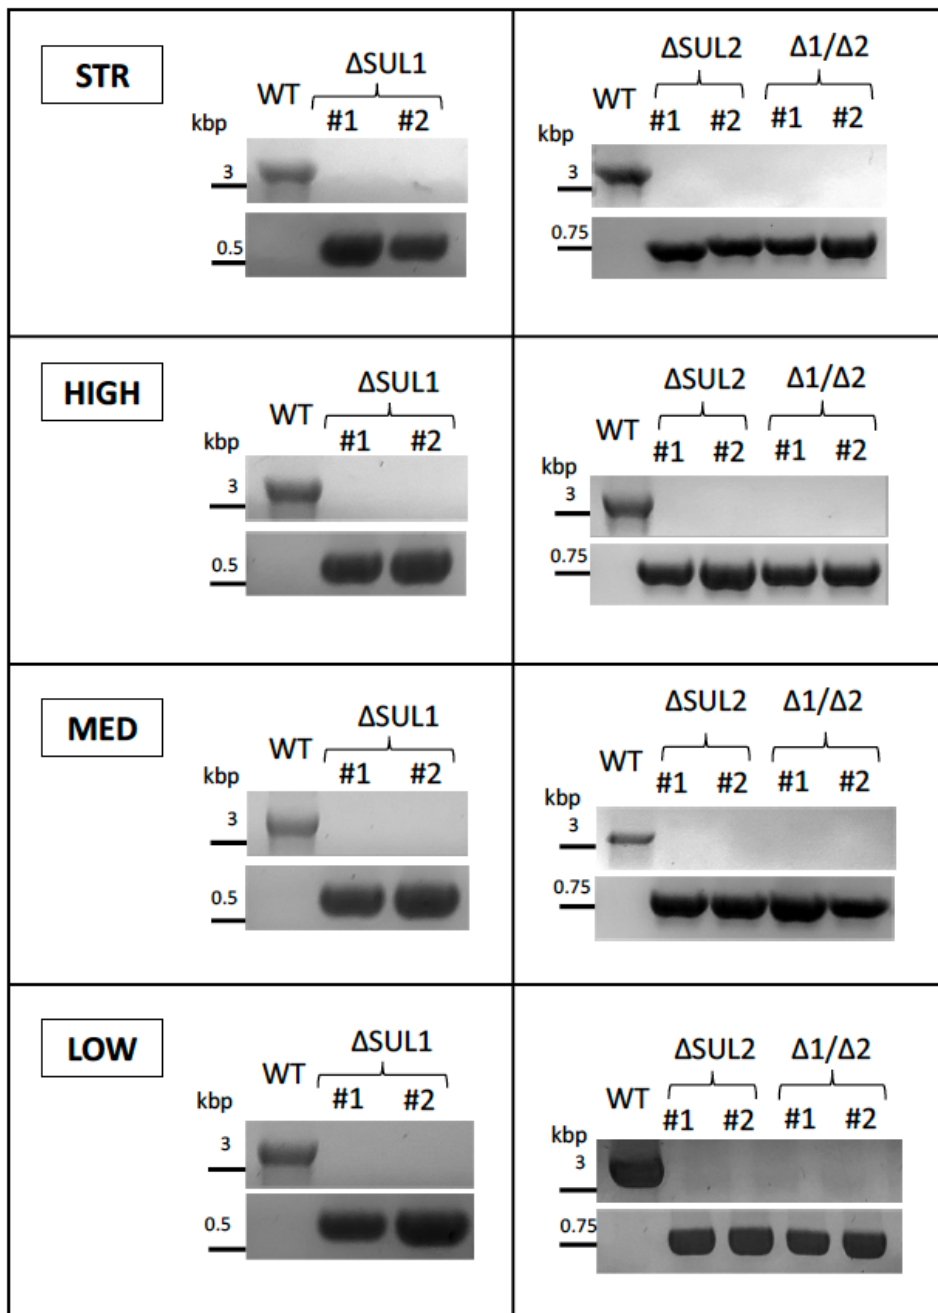

**Supplementary Figure S2. PCR analysis of *SUL1* and *SUL2* loci**

Agarose gel electrophoresis showing PCR amplifications of the genomic DNA, extracted from two different clones (#1, #2) generated by the CRISPR/Cas9-assisted genetic modification of the indicated strains (STR, HIGH, MED, LOW) targeting either *SUL1*, or *SUL2* genes, or both ( $\Delta 1/\Delta 2$ ). Unmodified (WT) strains were used as controls. The PCR were performed using either dgSUL1, or dgSUL2, forward (F) and reverse (R) primers, respectively mapped outside the *SUL1* or the *SUL2* coding sequence. PCR fragments are expected to be sized ~3500 bp for the parental alleles, ~570 bp for  $\Delta$ SUL1 and ~800 for  $\Delta$ SUL2 alleles.

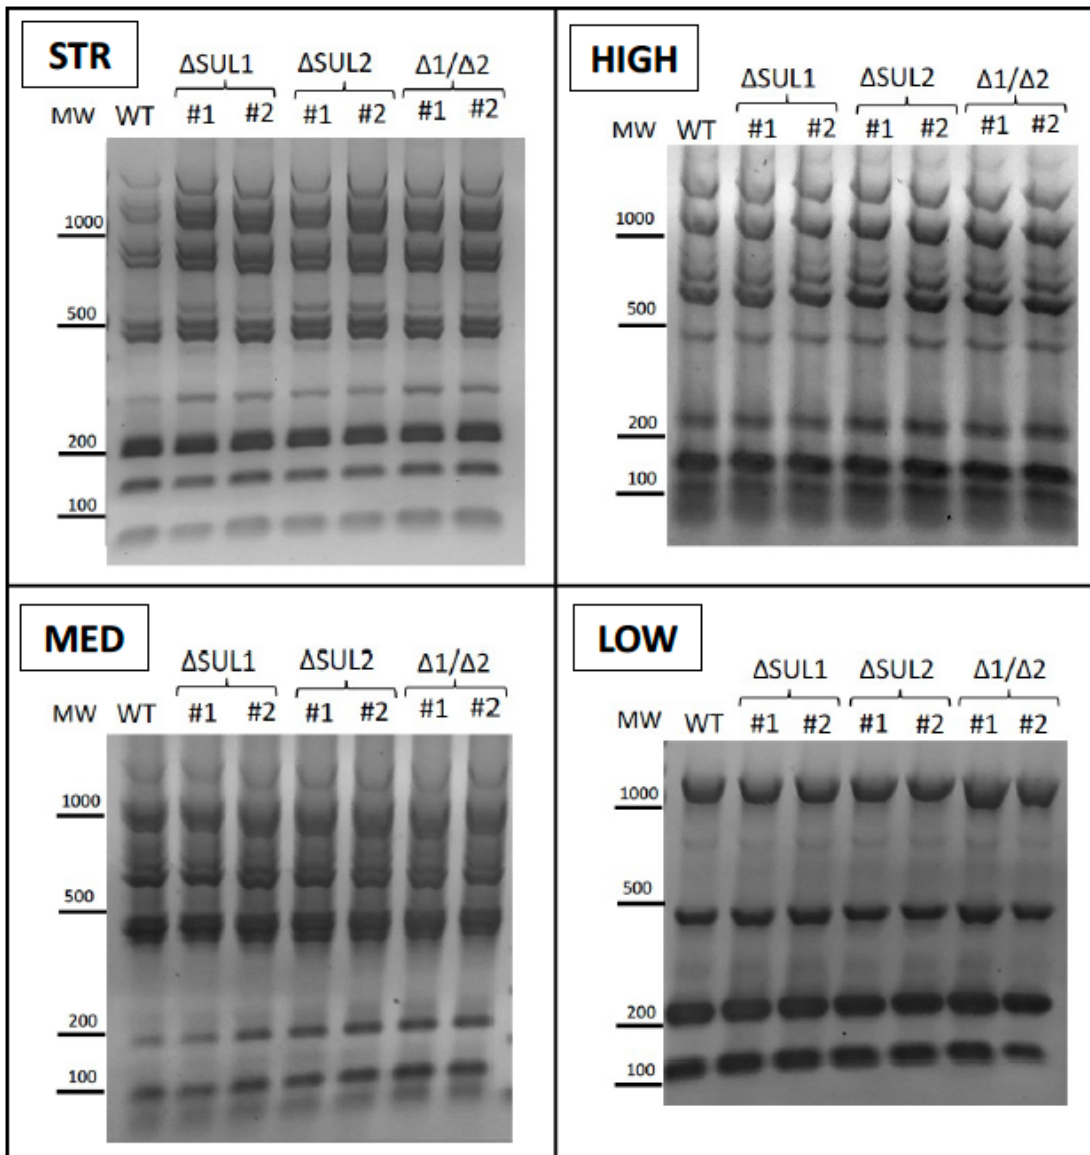

**Supplementary Figure S3. Genotype analysis by PCR inter-delta assay**

Agarose gel electrophoresis showing the inter-Delta profile obtained by PCR amplifications of the genomic DNA from two different clones (#1, #2) of the indicated strains (STR, HIGH, MED, LOW) deleted for either *SUL1*, or *SUL2* genes, or both ( $\Delta$ 1/ $\Delta$ 2). Unmodified (WT) strains were used as controls. The PCR were performed using  $\delta$ 12 and  $\delta$ 21 primers as reported (see Materials and Methods)

**Supplementary Table S1.** Volatile compounds detected by GC-MS assay (values are expressed as mean  $\pm$  S.E.,  $n=4$ ).

|                          | STR            |  |                |  | HIGH          |  |               |  | MED           |  |               |  | LOW            |  |               |  |
|--------------------------|----------------|--|----------------|--|---------------|--|---------------|--|---------------|--|---------------|--|----------------|--|---------------|--|
|                          | WT             |  | ASUL1/ASUL2    |  | WT            |  | ASUL1/ASUL2   |  | WT            |  | ASUL1/ASUL2   |  | WT             |  | ASUL1/ASUL2   |  |
| ALCOHOLS (mg/L)          |                |  |                |  |               |  |               |  |               |  |               |  |                |  |               |  |
| 2-Methyl-propanol        | 18,66 ± 1,55   |  | 15,91 ± 1,12   |  | 19,08 ± 0,29  |  | 17,51 ± 1,04  |  | 15,66 ± 0,31  |  | 16,38 ± 1,13  |  | 23,91 ± 3,03   |  | 19,75 ± 2,31  |  |
| n-Butanol                | 0,08 ± 0,02    |  | 0,11 ± 0,00    |  | 0,06 ± 0,01   |  | 0,09 ± 0,01   |  | 0,13 ± 0,00   |  | 0,15 ± 0,00   |  | 0,11 ± 0,01    |  | 0,09 ± 0,00   |  |
| 2-Methyl-butanol         | 13,43 ± 0,18   |  | 12,13 ± 0,38   |  | 15,67 ± 0,59  |  | 12,32 ± 0,22  |  | 13,14 ± 0,13  |  | 13,47 ± 0,24  |  | 16,15 ± 1,58   |  | 13,08 ± 0,26  |  |
| 3-Methyl-butanol         | 73,41 ± 1,35   |  | 69,11 ± 1,9    |  | 107,77 ± 3,47 |  | 87,95 ± 2,67  |  | 85,73 ± 2,39  |  | 82,67 ± 0,29  |  | 86,13 ± 1,78   |  | 67,21 ± 0,51  |  |
| 2-phenyl-ethanol         | 44,78 ± 5,92   |  | 43,60 ± 0,74   |  | 32,17 ± 4,57  |  | 23,59 ± 0,37  |  | 45,16 ± 0,47  |  | 47,00 ± 0,75  |  | 44,88 ± 4,53   |  | 32,65 ± 3,10  |  |
| 1-hexanol                | 0,87 ± 0,08    |  | 0,92 ± 0,01    |  | 0,68 ± 0,09   |  | 0,90 ± 0,05   |  | 1,08 ± 0,01   |  | 1,08 ± 0,01   |  | 0,86 ± 0,08    |  | 0,95 ± 0,06   |  |
| Benzyl alcohol           | 0,13 ± 0,02    |  | 0,16 ± 0,01    |  | 0,09 ± 0,01   |  | 0,11 ± 0,01   |  | 0,16 ± 0,00   |  | 0,15 ± 0,01   |  | 0,12 ± 0,01    |  | 0,16 ± 0,02   |  |
| trans-3-hexenol          | 0,14 ± 0,01    |  | 0,15 ± 0,00    |  | 0,09 ± 0,02   |  | 0,12 ± 0,01   |  | 0,15 ± 0,00   |  | 0,15 ± 0,00   |  | 0,13 ± 0,00    |  | 0,15 ± 0,00   |  |
| cis-3-hexenol            | 0,30 ± 0,03    |  | 0,34 ± 0,00    |  | 0,18 ± 0,04   |  | 0,27 ± 0,01   |  | 0,34 ± 0,00   |  | 0,33 ± 0,01   |  | 0,27 ± 0,01    |  | 0,32 ± 0,00   |  |
| 1,95 ± 0,27              |                |  | 2,81 ± 0,09    |  | 0,23 ± 0,01   |  | 0,85 ± 0,05   |  | 4,99 ± 0,22   |  | 12,31 ± 0,71  |  | 0,10 ± 0,01    |  | 0,83 ± 0,06   |  |
| 3-Methyl-thio-propanol   | 0,74 ± 0,23    |  | 0,51 ± 0,02    |  | 0,80 ± 0,09   |  | 0,20 ± 0,00   |  | 1,16 ± 0,09   |  | 0,48 ± 0,04   |  | 2,22 ± 0,15    |  | 0,32 ± 0,06   |  |
| tot                      | 154,49 ± 9,66  |  | 145,75 ± 4,27  |  | 176,80 ± 9,19 |  | 143,90 ± 4,45 |  | 167,70 ± 3,63 |  | 174,17 ± 3,18 |  | 174,88 ± 11,18 |  | 135,51 ± 6,38 |  |
| CARBOXYLIC ACIDS (mg/L)  |                |  |                |  |               |  |               |  |               |  |               |  |                |  |               |  |
| 2-Methyl-propanoic       | 0,94 ± 0,08    |  | 1,16 ± 0,03    |  | 0,77 ± 0,10   |  | 0,91 ± 0,04   |  | 1,08 ± 0,03   |  | 0,89 ± 0,01   |  | 1,39 ± 0,04    |  | 1,36 ± 0,06   |  |
| Butanoic                 | 0,32 ± 0,03    |  | 0,39 ± 0,01    |  | 0,24 ± 0,01   |  | 0,32 ± 0,02   |  | 0,56 ± 0,01   |  | 0,52 ± 0,02   |  | 0,36 ± 0,00    |  | 0,43 ± 0,03   |  |
| 3-Methyl-butanoic        | 0,11 ± 0,01    |  | 0,13 ± 0,00    |  | 0,16 ± 0,01   |  | 0,17 ± 0,01   |  | 0,23 ± 0,00   |  | 0,19 ± 0,01   |  | 0,20 ± 0,01    |  | 0,21 ± 0,00   |  |
| Hexanoic                 | 2,27 ± 0,26    |  | 2,44 ± 0,02    |  | 3,17 ± 0,17   |  | 3,48 ± 0,28   |  | 7,91 ± 0,32   |  | 5,61 ± 0,48   |  | 3,87 ± 0,22    |  | 4,17 ± 0,23   |  |
| Octanoic                 | 7,48 ± 1,17    |  | 8,29 ± 0,04    |  | 8,02 ± 0,56   |  | 9,75 ± 0,89   |  | 18,32 ± 0,70  |  | 13,29 ± 0,91  |  | 7,56 ± 0,43    |  | 8,60 ± 0,53   |  |
| Decanoic                 | 3,48 ± 0,60    |  | 4,38 ± 0,06    |  | 1,38 ± 0,11   |  | 1,85 ± 0,18   |  | 4,25 ± 0,23   |  | 2,44 ± 0,14   |  | 0,62 ± 0,06    |  | 0,90 ± 0,16   |  |
| tot                      | 14,60 ± 2,15   |  | 16,80 ± 0,16   |  | 13,74 ± 0,96  |  | 16,48 ± 1,42  |  | 32,35 ± 1,30  |  | 22,94 ± 1,57  |  | 14,00 ± 0,76   |  | 15,67 ± 1,00  |  |
| ESTERS (mg/L)            |                |  |                |  |               |  |               |  |               |  |               |  |                |  |               |  |
| Ethyl lactate            | 0,34 ± 0,01    |  | 0,38 ± 0,00    |  | 0,24 ± 0,00   |  | 0,30 ± 0,01   |  | 0,30 ± 0,01   |  | 0,32 ± 0,00   |  | 0,32 ± 0,01    |  | 0,31 ± 0,01   |  |
| Monoethyl-succinate      | 1,07 ± 0,16    |  | 1,65 ± 0,00    |  | 0,60 ± 0,12   |  | 1,22 ± 0,03   |  | 1,49 ± 0,03   |  | 1,34 ± 0,09   |  | 1,02 ± 0,14    |  | 0,91 ± 0,02   |  |
| Diethyl-succinate        | 0,05 ± 0,00    |  | 0,05 ± 0,01    |  | 0,08 ± 0,01   |  | 0,10 ± 0,01   |  | 0,07 ± 0,00   |  | 0,06 ± 0,00   |  | 0,14 ± 0,00    |  | 0,11 ± 0,01   |  |
| Ethyl isobutyrate        | 0,68 ± 0,08    |  | 1,06 ± 0,05    |  | 0,12 ± 0,00   |  | 0,30 ± 0,02   |  | 0,19 ± 0,01   |  | 0,36 ± 0,00   |  | 0,17 ± 0,01    |  | 0,42 ± 0,01   |  |
| Ethyl butanoate          | 0,79 ± 0,08    |  | 0,76 ± 0,06    |  | 0,53 ± 0,06   |  | 0,62 ± 0,05   |  | 0,95 ± 0,02   |  | 0,87 ± 0,02   |  | 0,86 ± 0,06    |  | 1,08 ± 0,05   |  |
| Ethyl 3-Methyl-butanoate | 0,00 ± 0,00    |  | 0,00 ± 0,00    |  | 0,00 ± 0,00   |  | 0,00 ± 0,00   |  | 0,00 ± 0,00   |  | 0,00 ± 0,00   |  | 0,00 ± 0,00    |  | 0,00 ± 0,00   |  |
| Ethyl hexanoate          | 0,89 ± 0,04    |  | 0,96 ± 0,03    |  | 1,04 ± 0,03   |  | 1,25 ± 0,04   |  | 1,69 ± 0,05   |  | 1,39 ± 0,02   |  | 1,11 ± 0,05    |  | 1,39 ± 0,03   |  |
| Ethyl octanoate          | 0,25 ± 0,02    |  | 0,20 ± 0,01    |  | 0,40 ± 0,02   |  | 0,43 ± 0,02   |  | 0,62 ± 0,03   |  | 0,54 ± 0,01   |  | 0,85 ± 0,03    |  | 0,81 ± 0,06   |  |
| Ethyl decanoate          | 0,05 ± 0,01    |  | 0,03 ± 0,00    |  | 0,10 ± 0,01   |  | 0,10 ± 0,01   |  | 0,19 ± 0,01   |  | 0,12 ± 0,00   |  | 0,14 ± 0,00    |  | 0,16 ± 0,00   |  |
| Ethyl 2-phenyl-acetate   | 0,00 ± 0,00    |  | 0,00 ± 0,00    |  | 0,00 ± 0,00   |  | 0,00 ± 0,00   |  | 0,00 ± 0,00   |  | 0,00 ± 0,00   |  | 0,00 ± 0,00    |  | 0,00 ± 0,00   |  |
| Isobutyl acetate         | 0,10 ± 0,00    |  | 0,10 ± 0,00    |  | 0,06 ± 0,00   |  | 0,06 ± 0,00   |  | 0,06 ± 0,00   |  | 0,06 ± 0,00   |  | 0,15 ± 0,02    |  | 0,11 ± 0,00   |  |
| n-Butyl acetate          | 0,04 ± 0,00    |  | 0,04 ± 0,00    |  | 0,05 ± 0,00   |  | 0,05 ± 0,00   |  | 0,03 ± 0,00   |  | 0,03 ± 0,00   |  | 0,04 ± 0,00    |  | 0,04 ± 0,00   |  |
| Isoamyl acetate          | 3,30 ± 0,15    |  | 3,11 ± 0,10    |  | 2,84 ± 0,06   |  | 2,40 ± 0,07   |  | 2,25 ± 0,05   |  | 2,20 ± 0,04   |  | 5,48 ± 0,67    |  | 4,01 ± 0,37   |  |
| n-Hexyl acetate          | 0,16 ± 0,02    |  | 0,17 ± 0,00    |  | 0,07 ± 0,01   |  | 0,09 ± 0,00   |  | 0,11 ± 0,00   |  | 0,12 ± 0,00   |  | 0,16 ± 0,02    |  | 0,16 ± 0,01   |  |
| 2-phenyl-ethyl acetate   | 1,42 ± 0,19    |  | 1,32 ± 0,02    |  | 0,70 ± 0,13   |  | 0,49 ± 0,02   |  | 0,90 ± 0,03   |  | 0,90 ± 0,03   |  | 1,70 ± 0,09    |  | 1,02 ± 0,19   |  |
| tot                      | 9,13 ± 0,76    |  | 9,84 ± 0,27    |  | 6,84 ± 0,46   |  | 7,41 ± 0,28   |  | 8,84 ± 0,24   |  | 8,32 ± 0,23   |  | 12,15 ± 1,10   |  | 10,53 ± 0,76  |  |
| TERPENES (µg/L)          |                |  |                |  |               |  |               |  |               |  |               |  |                |  |               |  |
| Linalool                 | 17,63 ± 0,80   |  | 20,85 ± 0,34   |  | 11,93 ± 1,09  |  | 14,16 ± 0,82  |  | 14,72 ± 0,39  |  | 16,19 ± 0,14  |  | 16,51 ± 1,03   |  | 15,52 ± 0,15  |  |
| α-Terpineol              | 2,19 ± 0,21    |  | 2,88 ± 0,06    |  | 1,23 ± 0,14   |  | 1,65 ± 0,09   |  | 2,48 ± 0,06   |  | 2,83 ± 0,03   |  | 1,92 ± 0,06    |  | 2,32 ± 0,15   |  |
| β-Citronellol            | 43,39 ± 1,33   |  | 43,53 ± 2,35   |  | 23,28 ± 0,95  |  | 23,25 ± 0,54  |  | 45,61 ± 0,76  |  | 43,32 ± 1,32  |  | 39,23 ± 0,54   |  | 40,29 ± 1,21  |  |
| Nerol                    | 52,85 ± 8,40   |  | 54,32 ± 10,98  |  | 34,24 ± 6,98  |  | 46,08 ± 6,98  |  | 59,09 ± 5,80  |  | 60,00 ± 3,06  |  | 55,84 ± 2,94   |  | 51,36 ± 4,52  |  |
| Geraniol                 | 26,06 ± 1,87   |  | 27,09 ± 1,60   |  | 14,15 ± 2,15  |  | 18,52 ± 0,48  |  | 16,88 ± 0,21  |  | 19,41 ± 0,49  |  | 20,46 ± 0,66   |  | 21,20 ± 0,61  |  |
| β-Damascenone            | 0,32 ± 0,06    |  | 0,51 ± 0,07    |  | 0,40 ± 0,10   |  | 0,67 ± 0,03   |  | 0,43 ± 0,07   |  | 0,43 ± 0,03   |  | 0,45 ± 0,09    |  | 0,56 ± 0,06   |  |
| β-Ionone                 | 0,60 ± 0,14    |  | 0,80 ± 0,00    |  | 0,40 ± 0,00   |  | 0,40 ± 0,00   |  | 0,53 ± 0,08   |  | 0,67 ± 0,08   |  | 0,47 ± 0,08    |  | 0,53 ± 0,08   |  |
| tot                      | 143,04 ± 12,81 |  | 149,98 ± 15,39 |  | 85,63 ± 11,40 |  | 104,73 ± 8,94 |  | 139,75 ± 7,37 |  | 142,84 ± 5,17 |  | 134,88 ± 5,39  |  | 131,79 ± 6,78 |  |
| ALDEHYDES (mg/L)         |                |  |                |  |               |  |               |  |               |  |               |  |                |  |               |  |
| Benzaldehyde             | 0,19 ± 0,01    |  | 0,18 ± 0,01    |  | 0,16 ± 0,02   |  | 0,19 ± 0,02   |  | 0,19 ± 0,01   |  | 0,17 ± 0,00   |  | 0,17 ± 0,01    |  | 0,19 ± 0,02   |  |
| KETONES                  |                |  |                |  |               |  |               |  |               |  |               |  |                |  |               |  |
| Diacetyl                 | nd             |  | nd             |  | nd            |  | nd            |  | nd            |  | nd            |  | nd             |  | nd            |  |
| Acetoin                  | nd             |  | nd             |  | nd            |  | nd            |  | nd            |  | nd            |  | nd             |  | nd            |  |

**Supplementary Table S2. List of Plasmid and Primers.**

| Plasmids generated and primers used |                   |                                                                                                          |
|-------------------------------------|-------------------|----------------------------------------------------------------------------------------------------------|
|                                     | Plasmid name      | Main features (size; yeast marker; bacterial marker; gDNA)                                               |
| 1)                                  | pMEL13-NotI       | 6130 bp; KanR; AmpR; gDNA: CAN1.Y-NotI                                                                   |
| 2)                                  | pMEL13-NotI-Cas9  | 10969 bp; KanR; AmpR; gDNA: CAN1.Y-NotI; SpCas9 expression                                               |
| 3)                                  | gSUL1-pMEL13-Cas9 | 10969 bp; KanR; AmpR; gDNA: SUL1; SpCas9 expression                                                      |
| 4)                                  | gSUL2-pMEL13-Cas9 | 10969 bp; KanR; AmpR; gDNA: SUL2; SpCas9 expression                                                      |
|                                     | Primer name       | Sequence 5'-3'                                                                                           |
| 1)                                  | pMEL-NotI-F       | CTCCGCAGTGAAAGATAAATGATCGATACGCGGCCGCTGGAGGAGTTTTAGAGCTA<br>GAAATAGCAAG                                  |
| 2)                                  | pMEL-NotI-R       | CTTGCTATTTCTAGCTCTAAACTCCTCCAGCGGCCGCGTATCGATCATTTATCTTTC<br>ACTGCGGAG                                   |
| 3)                                  | Cas9-pMEL F       | ATTAAGGGTTGTGCGA C AGCTCATAGCTTCAAATGTTTCTACTCC                                                          |
| 4)                                  | Cas9-pMEL R       | TACGCTGCAGGTCGA C CAAATTAAGCCTTCGAGCGTCCC                                                                |
| 5)                                  | 6006 F            | GTTTTAGAGCTAGAAATAGCAAGTTAAATAAAGGCTAGTC                                                                 |
| 6)                                  | gSUL1 target R    | TTCTAGCTCTAAACTTAGATTGTATCTCATTTATGATCATTTATCTTTCCTGCGGA<br>GA                                           |
| 7)                                  | gSUL2 target R    | TTCTAGCTCTAAACTTTGATAATTTGTGTAACCGATCATTTATCTTTCCTGCGGA<br>GA                                            |
| 8)                                  | ssSUL1 repair F   | CAATAGCTTTAAAAATAAAAAATAAATCCCTGCAGAATACTCGGAAAGAATTGTAGT<br>AGATAGTAAGTACTTTAATTACCCCCCTGTTTTAGTTATACA  |
| 9)                                  | ssSUL1 repair R   | TGTATACTAAAAACAGGGGGGGTAATTAAGTACTTACTACTACTACAATTCTTT<br>CCGAGTATTCTGCAGGGATTATTTTATTTTAAAGCTATTG       |
| 10)                                 | ssSUL2 repair F   | TCTTTCTTGAGGTGTGTGTGTGTATAGATTAGCAGGGAATTATCTAAGATCCAATG<br>CATTTACAATGGACATGCAAACATTTATATCATCTCTTTTTTTC |
| 11)                                 | ssSUL2 repair R   | GAAAAAAGAGATGATATAAATGTTTGCATGTCCATTGTAAATGCATTGGATCTTA<br>GATAATTCCTGCTAATCTATACACACACCTCAAGAAAGA       |
| 12)                                 | dgSUL1 control F  | AAACTCCACACCTTCCCCAC                                                                                     |
| 13)                                 | dgSUL1 control R  | GACCATGTCTTTTCAGCGCC                                                                                     |
| 14)                                 | dgSUL2 control F  | ACTAGCAACGTCGGATAGCG                                                                                     |
| 15)                                 | dgSUL2 control R  | TAAGTGACATCGGGGATGCC                                                                                     |
| 16)                                 | δ12               | TCAACAATGGAATCCCAAC                                                                                      |
| 17)                                 | δ21               | CATCTTAACACCGTATATGA                                                                                     |

**Supplementary Table S3. Characterization of natural must types.**

|    | Must            | Winery (Italy) | Year | Sugar (g/L) | YAN* (mg/L) | SO <sub>4</sub> <sup>2-</sup> (mg/L) | Free SO <sub>2</sub> (mg/L) | Total SO <sub>2</sub> (mg/L) | pH   |
|----|-----------------|----------------|------|-------------|-------------|--------------------------------------|-----------------------------|------------------------------|------|
| 1) | Prosecco        | Lorenzonetto   | 2021 | 124.4       | 108         | 390                                  | 8.3                         | 37.7                         | 3.37 |
| 2) | Gewurztraminer  | Caldaro        | 2020 | 137.7       | 167         | 550                                  | 4.4                         | 18.7                         | 3.53 |
| 3) | Sauvignon blanc | Masut rive     | 2021 | 204         | 202         | 480                                  | 5.8                         | 27.4                         | 3.35 |
| 4) | Prosecco (2)    | Vigna vecchia  | 2020 | 138         | 81          | 124                                  | 10.2                        | 28.8                         | 3.35 |

\*: YAN, yeast assimilable nitrogen
